# Supplementary material
Source: MDPI journal article supplement (https://www.mdpi.com/2071-1050/16/5/1730)
Supplement: s1 [file s1]

## SUPPLEMENTARY MATERIAL

# Quantifying Sectoral Carbon Footprints in Türkiye's Largest Metropolitan Cities: A Monte Carlo Simulation Approach

Sena Ecem Yakut Şevik \* and Ahmet Duran Şahin

Sustainable Energy and Climate Systems Laboratory, Meteorological Engineering,  
Aeronautics and Astronautics Faculty, Istanbul Technical University, 34469 Istanbul,  
Türkiye;  
sahind@itu.edu.tr

\* Correspondence: yakuts@itu.edu.tr

## S1. ABBREVIATIONS USED in SUPPLEMENTARY MATERIAL

Agr. Irr. : Agricultural irrigation

CDD: Cooling degree days

Civil Avi.: Civil Aviation

Com./Ins. Build.: Commercial/institutional buildings

EFs: Emission factors

Energy Ind.: Energy industry

FC: Fuel consumed

GHG: Greenhouse gas

HDD: Heating degree days

LPG: Liquefied petroleum gas

LTO: Landing/take-off cycles

Man. Ind. & Const.: Manufacturing industry and construction

MCS: Monte Carlo Simulation

Water-borne Nav.: Water-borne navigation

## S2. SYMBOLS USED in SUPPLEMENTARY MATERIAL

°C: Celsius degree

CH<sub>4</sub>: Methane

CO<sub>2</sub>: Carbon dioxide

GDP/capita: Gross domestic product per capita

gGHG/kg waste: gram of greenhouse gas per kilogram of waste

g MJ<sup>-1</sup>: gram per megajoule

kg LTO<sup>-1</sup>: kilogram per landing/take-off cycles

kg<sub>LTO</sub> GHG<sup>-1</sup>: kilogram of landing/take-off cycles per greenhouse gas

kg t<sup>-1</sup> of fuel: kilogram per ton of fuel

kg TJ<sup>-1</sup>: kilogram per terajoule

ktCO<sub>2</sub>e yr<sup>-1</sup>: kilotonnes carbon dioxide equivalent per year

L 100km<sup>-1</sup>: Liter per 100 kilometer

N<sub>2</sub>O: Nitrous oxide

T: Temperature

tCO<sub>2</sub>e/capita: ton carbon dioxide equivalent per capita

### S3. GREENHOUSE GAS EMISSIONS FROM STATIONARY COMBUSTION

**Table S1.** Energy industry, man. ind. & const. CH<sub>4</sub> and N<sub>2</sub>O EFs (kg TJ<sup>-1</sup>) [113].

| GHG Type         | Gasoline (Engine, Aviation and Jet) | Diesel | Fuel Oil | Natural Gas |
|------------------|-------------------------------------|--------|----------|-------------|
| CH <sub>4</sub>  | 3                                   | 3      | 3        | 1           |
| N <sub>2</sub> O | 0,6                                 | 0,6    | 0,6      | 0,1         |

**Table S2.** CH<sub>4</sub> and N<sub>2</sub>O EFs of commercial/institutional buildings, residential and agricultural/forestry/fishing activities (kg TJ<sup>-1</sup>) [113].

| GHG Type         | Fuel Oil | Anthracite | Natural Gas |
|------------------|----------|------------|-------------|
| CH <sub>4</sub>  | 10       | 300        | 5           |
| N <sub>2</sub> O | 0,6      | 1,5        | 0,1         |

### S4. GREENHOUSE GAS EMISSIONS FROM MOBILE COMBUSTION

#### S4.1. Greenhouse gas emissions from road transport

**Table S3.** CH<sub>4</sub> and N<sub>2</sub>O EFs of fuels used on the road (kg TJ<sup>-1</sup>) [113].

| GHG Type         | Gasoline (Engine) | Diesel | Natural Gas | LPG |
|------------------|-------------------|--------|-------------|-----|
| CH <sub>4</sub>  | 25                | 3,9    | 92          | 62  |
| N <sub>2</sub> O | 8                 | 3,9    | 3           | 0,2 |

**Table S4.** Average FC (L 100km<sup>-1</sup>) and EF (g MJ<sup>-1</sup>) for different vehicle and fuel types [120].

| Vehicle Type   | Fuel Type | Average FC (L 100km <sup>-1</sup> ) | EF (CO <sub>2</sub> ) (g MJ <sup>-1</sup> ) | EF (CH <sub>4</sub> ) (g MJ <sup>-1</sup> ) | EF (N <sub>2</sub> O) (g MJ <sup>-1</sup> ) |
|----------------|-----------|-------------------------------------|---------------------------------------------|---------------------------------------------|---------------------------------------------|
| Passenger Cars | Gasoline  | 8.5                                 | 73                                          | 0.007                                       | 0.02                                        |
|                | Diesel    | 7.3                                 | 74                                          | 0.002                                       | 0.004                                       |
|                | LPG       | 11.2                                | 65                                          | 0.02                                        | -                                           |
| Van            | Gasoline  | 13.6                                | 73                                          | 0.02                                        | 0.001                                       |
|                | Diesel    | 10.9                                | 74                                          | 0.001                                       | 0.004                                       |
| Truck          | Gasoline  | 22.5                                | 73                                          | 0.02                                        | 0.001                                       |
|                | Diesel    | 29.9                                | 74                                          | 0.006                                       | 0.003                                       |
| Bus            | Gasoline  | 22.5                                | 73                                          | 0.02                                        | 0.001                                       |
|                | Diesel    | 29.9                                | 74                                          | 0.006                                       | 0.003                                       |
| Minibus        | Gasoline  | 13.6                                | 73                                          | 0.02                                        | 0.001                                       |

|             |          |      |    |       |       |
|-------------|----------|------|----|-------|-------|
| Motorcycles | Diesel   | 10.9 | 74 | 0.001 | 0.004 |
|             | Gasoline | 4    | 73 | 0.1   | 0.002 |

#### S4.2. Greenhouse gas emissions from civil aviation

**Table S5.** CO<sub>2</sub>, CH<sub>4</sub> and N<sub>2</sub>O EFs for airline [113].

| Fuel Type                                | CO <sub>2</sub> | CH <sub>4</sub> | N <sub>2</sub> O |
|------------------------------------------|-----------------|-----------------|------------------|
| Aviation Gasoline (kg TJ <sup>-1</sup> ) | 70000           | 0,5             | 2                |
| Jet Kerosene (kg TJ <sup>-1</sup> )      | 71500           | 0,5             | 2                |
| Cruise (kg t <sup>-1</sup> of fuel)      | 3150            | 0               | 0,1              |

**Table S6.** EFs (kg<sub>LTO</sub> GHG<sup>-1</sup>) and FC (kg LTO<sup>-1</sup>) for different aircraft types [113].

| Aircraft Types  | EF (CO <sub>2</sub> ) | EF (CH <sub>4</sub> ) | EF (N <sub>2</sub> O) | LTO FC |
|-----------------|-----------------------|-----------------------|-----------------------|--------|
| A310            | 4760                  | 0.63                  | 0.2                   | 1510   |
| A319            | 2310                  | 0.06                  | 0.1                   | 730    |
| A321            | 3020                  | 0.14                  | 0.1                   | 960    |
| A330-200/300    | 7050                  | 0.13                  | 0.2                   | 2230   |
| A340-200        | 5890                  | 0.42                  | 0.2                   | 1860   |
| A340-300        | 6380                  | 0.39                  | 0.2                   | 2020   |
| A340-500/600    | 10660                 | 0.01                  | 0.3                   | 3370   |
| 737-100/200     | 2740                  | 0.45                  | 0.1                   | 870    |
| 737-300/400/500 | 2480                  | 0.08                  | 0.1                   | 780    |
| 737-600         | 2280                  | 0.1                   | 0.1                   | 720    |
| 737-700         | 2460                  | 0.09                  | 0.1                   | 780    |
| 737-800/900     | 2780                  | 0.07                  | 0.1                   | 880    |
| 747-100         | 10140                 | 4.84                  | 0.3                   | 3210   |
| 747-200         | 11370                 | 1.82                  | 0.4                   | 3600   |
| 747-300         | 11080                 | 0.27                  | 0.4                   | 3510   |
| 757-200         | 4320                  | 0.02                  | 0.1                   | 1370   |
| 757-300         | 4630                  | 0.01                  | 0.1                   | 1460   |
| 767-200         | 4620                  | 0.33                  | 0.1                   | 1460   |
| 767-300         | 5610                  | 0.12                  | 0.2                   | 1780   |
| 777-200/300     | 8100                  | 0.07                  | 0.3                   | 2560   |
| DC-8-50/60/70   | 5360                  | 0.15                  | 0.2                   | 1700   |
| MD-11           | 7290                  | 0.24                  | 0.2                   | 2310   |
| MD-80           | 3180                  | 0.19                  | 0.1                   | 1010   |
| ERJ-145         | 990                   | 0.06                  | 0.03                  | 310    |

#### S4.3. Greenhouse gas emissions from railway transport

**Table S7.** CH<sub>4</sub> and N<sub>2</sub>O EFs for railway (kg TJ<sup>-1</sup>) [113].

| Fuel Type           | CH <sub>4</sub> | N <sub>2</sub> O |
|---------------------|-----------------|------------------|
| Diesel              | 4,15            | 28,6             |
| Low-Bituminous Coal | 2               | 1,5              |

## S5. MONTE CARLO SIMULATION METHOD

**Table S8.** EF values taken for the MCS (kg TJ<sup>-1</sup>) [113].

| Sub-sector            | Fuel                               | GHG                              | a     | c     | b      |
|-----------------------|------------------------------------|----------------------------------|-------|-------|--------|
| Stationary Combustion | Natural Gas                        | CO <sub>2</sub>                  | 54300 | 56100 | 58300  |
|                       |                                    | CH <sub>4</sub>                  | 1.5   | 5     | 15     |
|                       |                                    | N <sub>2</sub> O                 | 0.03  | 0.1   | 0.3    |
|                       | Coal                               | CO <sub>2</sub>                  | 94600 | 98300 | 101000 |
|                       |                                    | CH <sub>4</sub>                  | 100   | 300   | 900    |
|                       |                                    | N <sub>2</sub> O                 | 0.5   | 1.5   | 5      |
|                       | Fuel Oil                           | CO <sub>2</sub>                  | 75500 | 77400 | 78800  |
|                       |                                    | CH <sub>4</sub>                  | 3     | 10    | 30     |
|                       |                                    | N <sub>2</sub> O                 | 0.2   | 0.6   | 2      |
| Mobile Combustion     | Gasoline (Road)                    | CO <sub>2</sub>                  | 67500 | 69300 | 73000  |
|                       |                                    | CH <sub>4</sub>                  | 7.5   | 25    | 86     |
|                       |                                    | N <sub>2</sub> O                 | 2.6   | 8     | 24     |
|                       | Diesel (Road)                      | CO <sub>2</sub>                  | 72600 | 74100 | 74800  |
|                       |                                    | CH <sub>4</sub>                  | 1.6   | 3.9   | 9.5    |
|                       |                                    | N <sub>2</sub> O                 | 1.3   | 3.9   | 12     |
|                       | LPG (Road)                         | CO <sub>2</sub>                  | 61600 | 63100 | 65600  |
|                       |                                    | CH <sub>4</sub>                  | 62    | 62    | 62     |
|                       |                                    | N <sub>2</sub> O                 | 0.2   | 0.2   | 0.2    |
|                       | Aviation Gasoline (Civil Aviation) | CO <sub>2</sub>                  | 67500 | 70000 | 73000  |
|                       |                                    | CH <sub>4</sub>                  | 0.215 | 0.5   | 1      |
|                       |                                    | N <sub>2</sub> O                 | 0.6   | 2     | 5      |
|                       | Jet Kerosene (Civil Aviation)      | CO <sub>2</sub>                  | 69800 | 71500 | 74400  |
|                       |                                    | CH <sub>4</sub>                  | 0.215 | 0.5   | 1      |
|                       |                                    | N <sub>2</sub> O                 | 0.6   | 2     | 5      |
|                       | Diesel (Railway)                   | CO <sub>2</sub>                  | 72600 | 74100 | 74800  |
|                       |                                    | CH <sub>4</sub>                  | 1.67  | 4.15  | 10.4   |
|                       |                                    | N <sub>2</sub> O                 | 14.3  | 28.6  | 85.8   |
|                       | Gasoline (Water-borne navigation)  | CO <sub>2</sub>                  | 67500 | 69300 | 73000  |
|                       |                                    | CH <sub>4</sub>                  | 3.5   | 7     | 10.5   |
|                       |                                    | N <sub>2</sub> O                 | 1.2   | 2     | 4.8    |
|                       | Fuel Oil (Water-borne navigation)  | CO <sub>2</sub>                  | 75500 | 77400 | 78800  |
|                       |                                    | CH <sub>4</sub>                  | 3.5   | 7     | 10.5   |
|                       |                                    | N <sub>2</sub> O                 | 1.2   | 2     | 4.8    |
|                       | Diesel (Water-borne navigation)    | CO <sub>2</sub>                  | 72600 | 74100 | 74800  |
|                       |                                    | CH <sub>4</sub>                  | 3.5   | 7     | 10.5   |
|                       |                                    | N <sub>2</sub> O                 | 1.2   | 2     | 4.8    |
| Composting            |                                    | CH <sub>4</sub> (gGHG/kg waste)  | 0.03  | 4     | 8      |
|                       |                                    | N <sub>2</sub> O (gGHG/kg waste) | 0.06  | 0.24  | 0.6    |

## S6. RESULTS

### S6.1 Amount of greenhouse gas emissions from stationary combustion

**Table S9.** Emissions from stationary combustion in Istanbul (ktCO<sub>2</sub>e yr<sup>-1</sup>).

| Years | Tier 1      |                  |                    |             |           | Tier 2      |                  |                    |             |           |
|-------|-------------|------------------|--------------------|-------------|-----------|-------------|------------------|--------------------|-------------|-----------|
|       | Residential | Com./Ins. Build. | Man. Ind. & Const. | Energy Ind. | Agr. Irr. | Residential | Com./Ins. Build. | Man. Ind. & Const. | Energy Ind. | Agr. Irr. |
| 2015  | 16790.5     | 12031.0          | 9070.7             | 5251.3      | 2.4       | 16736.2     | 12018.6          | 9050.2             | 5212.0      | 2.4       |
| 2016  | 17422.7     | 12429.6          | 8893.2             | 3098.0      | 2.5       | 17351.6     | 12420.0          | 8872.6             | 3075.4      | 2.5       |
| 2017  | 18087.3     | 12844.7          | 9514.5             | 3984.9      | 3.2       | 18004.6     | 12832.2          | 9489.6             | 3950.9      | 3.2       |
| 2018  | 17607.8     | 16406.0          | 8013.8             | 3407.7      | 4.8       | 17482.6     | 16366.9          | 7993.3             | 3357.3      | 4.8       |
| 2019  | 18961.7     | 17309.0          | 8658.3             | 2901.8      | 11.6      | 18562.3     | 17181.1          | 8603.1             | 2776.3      | 11.6      |
| 2020  | 19701.2     | 15273.6          | 7295.5             | 2856.0      | 18.7      | 19614.4     | 15252.4          | 7286.5             | 2834.1      | 18.7      |

**Table S10.** Heating-cooling degree day temperatures of Istanbul province [110].

| Years | HDD  | T≤15°C | CDD | T>22°C |
|-------|------|--------|-----|--------|
| 2015  | 1686 | 184    | 238 | 88     |
| 2016  | 1590 | 175    | 286 | 106    |
| 2017  | 1812 | 198    | 199 | 83     |
| 2018  | 1560 | 171    | 279 | 96     |
| 2019  | 1516 | 168    | 187 | 93     |
| 2020  | 1552 | 185    | 223 | 104    |

**Table S11.** Emissions from stationary combustion in Izmir (ktCO<sub>2</sub>e yr<sup>-1</sup>).

| Years | Tier 1      |                  |                    |             |           | Tier 2      |                  |                    |             |           |
|-------|-------------|------------------|--------------------|-------------|-----------|-------------|------------------|--------------------|-------------|-----------|
|       | Residential | Com./Ins. Build. | Man. Ind. & Const. | Energy Ind. | Agr. Irr. | Residential | Com./Ins. Build. | Man. Ind. & Const. | Energy Ind. | Agr. Irr. |
| 2015  | 3701.2      | 2430.0           | 10560.1            | 5364.2      | 233.7     | 3698.1      | 2429.0           | 10533.6            | 5324.1      | 233.7     |
| 2016  | 4145.2      | 2809.1           | 11209.0            | 4952.7      | 273.8     | 4139.6      | 2808.0           | 11183.1            | 4916.5      | 273.8     |
| 2017  | 4474.4      | 2968.2           | 10120.3            | 6050.6      | 271.7     | 4464.8      | 2966.8           | 10096.0            | 5998.8      | 271.7     |
| 2018  | 4922.5      | 3261.0           | 10469.9            | 5896.6      | 284.6     | 4914.1      | 3258.6           | 10431.6            | 5809.4      | 284.6     |
| 2019  | 4765.3      | 3979.7           | 12600.6            | 3719.8      | 306.6     | 4712.6      | 3972.5           | 12419.1            | 3558.9      | 306.6     |
| 2020  | 4696.7      | 3492.8           | 11466.9            | 2794.8      | 315.8     | 4685.9      | 3491.6           | 11435.1            | 2773.4      | 315.8     |

**Table S12.** Heating-cooling degree day temperatures of Izmir province [110].

| Years | HDD  | T≤15°C | CDD | T>22°C |
|-------|------|--------|-----|--------|
| 2015  | 1184 | 150    | 575 | 128    |
| 2016  | 972  | 114    | 722 | 126    |
| 2017  | 985  | 130    | 687 | 131    |
| 2018  | 803  | 110    | 735 | 148    |
| 2019  | 857  | 124    | 707 | 137    |
| 2020  | 867  | 128    | 747 | 141    |

**Table S13.** Emissions from stationary combustion in Ankara (ktCO<sub>2e</sub> yr<sup>-1</sup>).

| Years | Tier 1      |                     |                             |                |              | Tier 2      |                     |                             |                |              |
|-------|-------------|---------------------|-----------------------------|----------------|--------------|-------------|---------------------|-----------------------------|----------------|--------------|
|       | Residential | Com./Ins.<br>Build. | Man.<br>Ind.<br>&<br>Const. | Energy<br>Ind. | Agr.<br>Irr. | Residential | Com./Ins.<br>Build. | Man.<br>Ind.<br>&<br>Const. | Energy<br>Ind. | Agr.<br>Irr. |
| 2015  | 6513.1      | 4841.8              | 2791.9                      | 2111.6         | 52.0         | 6490.8      | 4831.7              | 2786.7                      | 2095.9         | 52.0         |
| 2016  | 7751.1      | 4770.3              | 2685.9                      | 2037.9         | 93.5         | 7714.4      | 4760.0              | 2680.4                      | 2023.0         | 93.5         |
| 2017  | 8179.4      | 5327.9              | 3319.5                      | 1994.2         | 100.8        | 8140.8      | 5314.2              | 3312.4                      | 1977.1         | 100.8        |
| 2018  | 8066.0      | 5633.0              | 4105.5                      | 2530.9         | 112.5        | 8026.0      | 5612.1              | 4093.5                      | 2493.5         | 112.5        |
| 2019  | 8798.2      | 5844.3              | 4781.6                      | 1437.9         | 139.0        | 8628.2      | 5774.2              | 4736.2                      | 1375.6         | 139.0        |
| 2020  | 9009.5      | 5136.2              | 4532.2                      | 1310.1         | 149.1        | 8947.0      | 5124.6              | 4526.7                      | 1300.0         | 149.1        |

**Table S14.** Heating-cooling degree day temperatures of Ankara province [110].

| Years | HDD  | T≤15°C | CDD | T>22°C |
|-------|------|--------|-----|--------|
| 2015  | 2511 | 203    | 213 | 76     |
| 2016  | 2410 | 212    | 262 | 77     |
| 2017  | 2493 | 217    | 289 | 80     |
| 2018  | 1951 | 182    | 211 | 76     |
| 2019  | 2169 | 194    | 191 | 74     |
| 2020  | 2182 | 198    | 329 | 102    |

**S6.2 Amount of greenhouse gas emissions from mobile combustion****Table S15:** Emissions from mobile combustion in Istanbul (ktCO<sub>2e</sub> yr<sup>-1</sup>).

| Years | Tier 1  |            |         |                     | Tier 2  |            |
|-------|---------|------------|---------|---------------------|---------|------------|
|       | Road    | Civil Avi. | Railway | Water-borne<br>Nav. | Road    | Civil Avi. |
| 2015  | 16332.2 | 1444.1     | 203.8   | 870.7               | 13501.5 | 2009.4     |
| 2016  | 17230.9 | 1488.0     | 224.6   | 30.9                | 14253.2 | 2032.5     |
| 2017  | 17360.0 | 1345.6     | 223.3   | 19.3                | 14391.5 | 1945.2     |
| 2018  | 17236.6 | 1376.4     | 269.7   | 22.1                | 14312.9 | 1992.5     |
| 2019  | 16261.8 | 1560.7     | 317.5   | 57.2                | 13500.1 | 1995.1     |
| 2020  | 14098.0 | 881.9      | 254.3   | 21.4                | 11682.8 | 867.3      |

**Table S16:** Emissions from mobile combustion in Ankara (ktCO<sub>2e</sub> yr<sup>-1</sup>).

| Years | Tier 1 |            |         | Tier 2 |            |
|-------|--------|------------|---------|--------|------------|
|       | Road   | Civil Avi. | Railway | Road   | Civil Avi. |
| 2015  | 7588.1 | 324.4      | 92.0    | 6006.2 | 323.2      |
| 2016  | 8256.3 | 1021.4     | 95.5    | 6558.1 | 1018.6     |
| 2017  | 8932.4 | 819.7      | 104.1   | 7134.9 | 816.1      |
| 2018  | 9046.6 | 812.3      | 115.1   | 7237.7 | 808.8      |
| 2019  | 8806.3 | 791.0      | 127.3   | 7044.3 | 788.7      |
| 2020  | 8126.6 | 449.5      | 107.6   | 6521.3 | 447.5      |

**Table S17:** Emissions from mobile combustion in Izmir (ktCO<sub>2e</sub> yr<sup>-1</sup>).

| Years | Road   | Tier 1     |         |                     | Tier 2 |            |
|-------|--------|------------|---------|---------------------|--------|------------|
|       |        | Civil Avi. | Railway | Water-borne<br>Nav. | Road   | Civil Avi. |
| 2015  | 5367.9 | 373.5      | 61.1    | 10.5                | 4288.0 | 373.3      |
| 2016  | 5812.8 | 426.0      | 67.8    | 55.4                | 4684.9 | 425.8      |
| 2017  | 6101.9 | 430.9      | 65.7    | 46.5                | 4951.7 | 431.7      |
| 2018  | 6208.5 | 425.6      | 74.4    | 37.5                | 5026.2 | 426.6      |
| 2019  | 5729.4 | 325.7      | 82.4    | 30.4                | 4456.8 | 326.6      |
| 2020  | 5392.4 | 199.3      | 63.7    | 54.7                | 4327.4 | 199.6      |

**S6.3 Amount of greenhouse gas emissions from enteric fermentation****Table S18:** Emissions from enteric fermentation (ktCO<sub>2e</sub> yr<sup>-1</sup>).

| Years | Ankara | Istanbul | Izmir  |
|-------|--------|----------|--------|
| 2015  | 747.2  | 156.9    | 1077.6 |
| 2016  | 795.5  | 155.3    | 1100.9 |
| 2017  | 1018.7 | 185.8    | 1304.4 |
| 2018  | 1166.0 | 191.1    | 1434.6 |
| 2019  | 1207.3 | 205.4    | 1457.8 |
| 2020  | 1308.5 | 213.8    | 1492.0 |

**S6.4 Amount of greenhouse gas emissions from waste sector****Table S19:** Emissions from solid waste landfills (ktCO<sub>2e</sub> yr<sup>-1</sup>).

| Years | Ankara | Istanbul | Izmir |
|-------|--------|----------|-------|
| 2015  | 395.5  | 3033.9   | 378.3 |
| 2016  | 533.1  | 3229.1   | 383.3 |
| 2017  | 513.7  | 3466.3   | 387.4 |
| 2018  | 506.1  | 3159.2   | 453.5 |
| 2019  | 524.6  | 2990.1   | 450.6 |
| 2020  | 429.4  | 2973.6   | 470.2 |

**S6.5 City-based comparisons****Table S20:** Total emission amount from Ankara, Istanbul, and Izmir (ktCO<sub>2e</sub> yr<sup>-1</sup>).

| Years | Ankara  | Istanbul | Izmir   |
|-------|---------|----------|---------|
| 2015  | 23683.4 | 63577.8  | 28126.4 |
| 2016  | 26684.6 | 62551.0  | 30175.4 |
| 2017  | 29157.3 | 65373.0  | 31155.5 |
| 2018  | 30948.0 | 66009.7  | 32407.5 |
| 2019  | 31409.9 | 67362.3  | 32217.3 |
| 2020  | 29851.6 | 62472.5  | 29334.7 |

**Table S21:** Per capita GHG emissions versus per capita GDP for all cities.

| Years | Ankara<br>(GDP/capita) | Ankara<br>(tCO <sub>2e</sub> /capita) | Istanbul<br>(GDP/capita) | Istanbul<br>(tCO <sub>2e</sub> /capita) | Izmir<br>(GDP/capita) | Izmir<br>(tCO <sub>2e</sub> /capita) |
|-------|------------------------|---------------------------------------|--------------------------|-----------------------------------------|-----------------------|--------------------------------------|
| 2015  | 2768.2                 | 4.49                                  | 3441.9                   | 4.34                                    | 2388.52               | 6.75                                 |
| 2016  | 2728.9                 | 4.99                                  | 3407.8                   | 4.23                                    | 2357.34               | 7.14                                 |
| 2017  | 2679.5                 | 5.35                                  | 3356.8                   | 4.35                                    | 2326.42               | 7.28                                 |
| 2018  | 3116.1                 | 5.62                                  | 3986.9                   | 4.38                                    | 2810.49               | 7.50                                 |

|      |        |      |        |      |         |      |
|------|--------|------|--------|------|---------|------|
| 2019 | 3649.2 | 5.57 | 4447.9 | 4.34 | 3131.94 | 7.38 |
| 2020 | 4431.1 | 5.27 | 5102.7 | 4.04 | 3629.17 | 6.68 |

## S6.6 Monte Carlo Simulation Results

**Table S22:** MCS results from 2015-2020 (ktCO<sub>2e</sub> yr<sup>-1</sup>).

|                    | City     | 2015    | 2016    | 2017    | 2018    | 2019    | 2020    | Total    |
|--------------------|----------|---------|---------|---------|---------|---------|---------|----------|
| Mean               | Ankara   | 24049.3 | 27476.7 | 29728.7 | 31335.2 | 31812.4 | 29887   | 174289.3 |
|                    | İstanbul | 65003.5 | 63891.3 | 66772.3 | 67429.8 | 69198.1 | 63521.8 | 395816.8 |
|                    | İzmir    | 28628.8 | 30685.1 | 31680.0 | 32748.6 | 32725.3 | 29700.4 | 186168.3 |
| %2,5               | Ankara   | 21831.6 | 25080.6 | 27118.4 | 28589.2 | 29037.8 | 27248.1 | 158905.7 |
|                    | İstanbul | 59665.0 | 58717.4 | 61333.2 | 61951.2 | 63570.9 | 58295.1 | 363532.8 |
|                    | İzmir    | 25970.1 | 27908.5 | 28792.0 | 29780.6 | 29749.4 | 26987.6 | 169188.1 |
| %97,5              | Ankara   | 26267.0 | 29872.8 | 32339.1 | 34081.2 | 34587   | 32525.9 | 189673.0 |
|                    | İstanbul | 70342.0 | 69065.1 | 72211.3 | 72908.5 | 74825.3 | 68748.6 | 428100.7 |
|                    | İzmir    | 31287.6 | 33461.8 | 34568.0 | 35716.6 | 35701.2 | 32413.2 | 203148.4 |
| Standard Deviation | Ankara   | 1131.5  | 1222.5  | 1331.8  | 1401.0  | 1415.6  | 1346.4  | 7848.8   |
|                    | İstanbul | 2723.7  | 2639.7  | 2775.0  | 2795.2  | 2871.0  | 2666.7  | 16471.4  |
|                    | İzmir    | 1356.5  | 1416.7  | 1473.5  | 1514.3  | 1518.3  | 1384.1  | 8663.3   |
